# Supplementary material for: Comprehensive transcriptome analysis provides new insights into nutritional strategies and phylogenetic relationships of chrysophytes
Source: PeerJ journal article supplement (doi:10.7717/peerj.2832), 2017-01-10

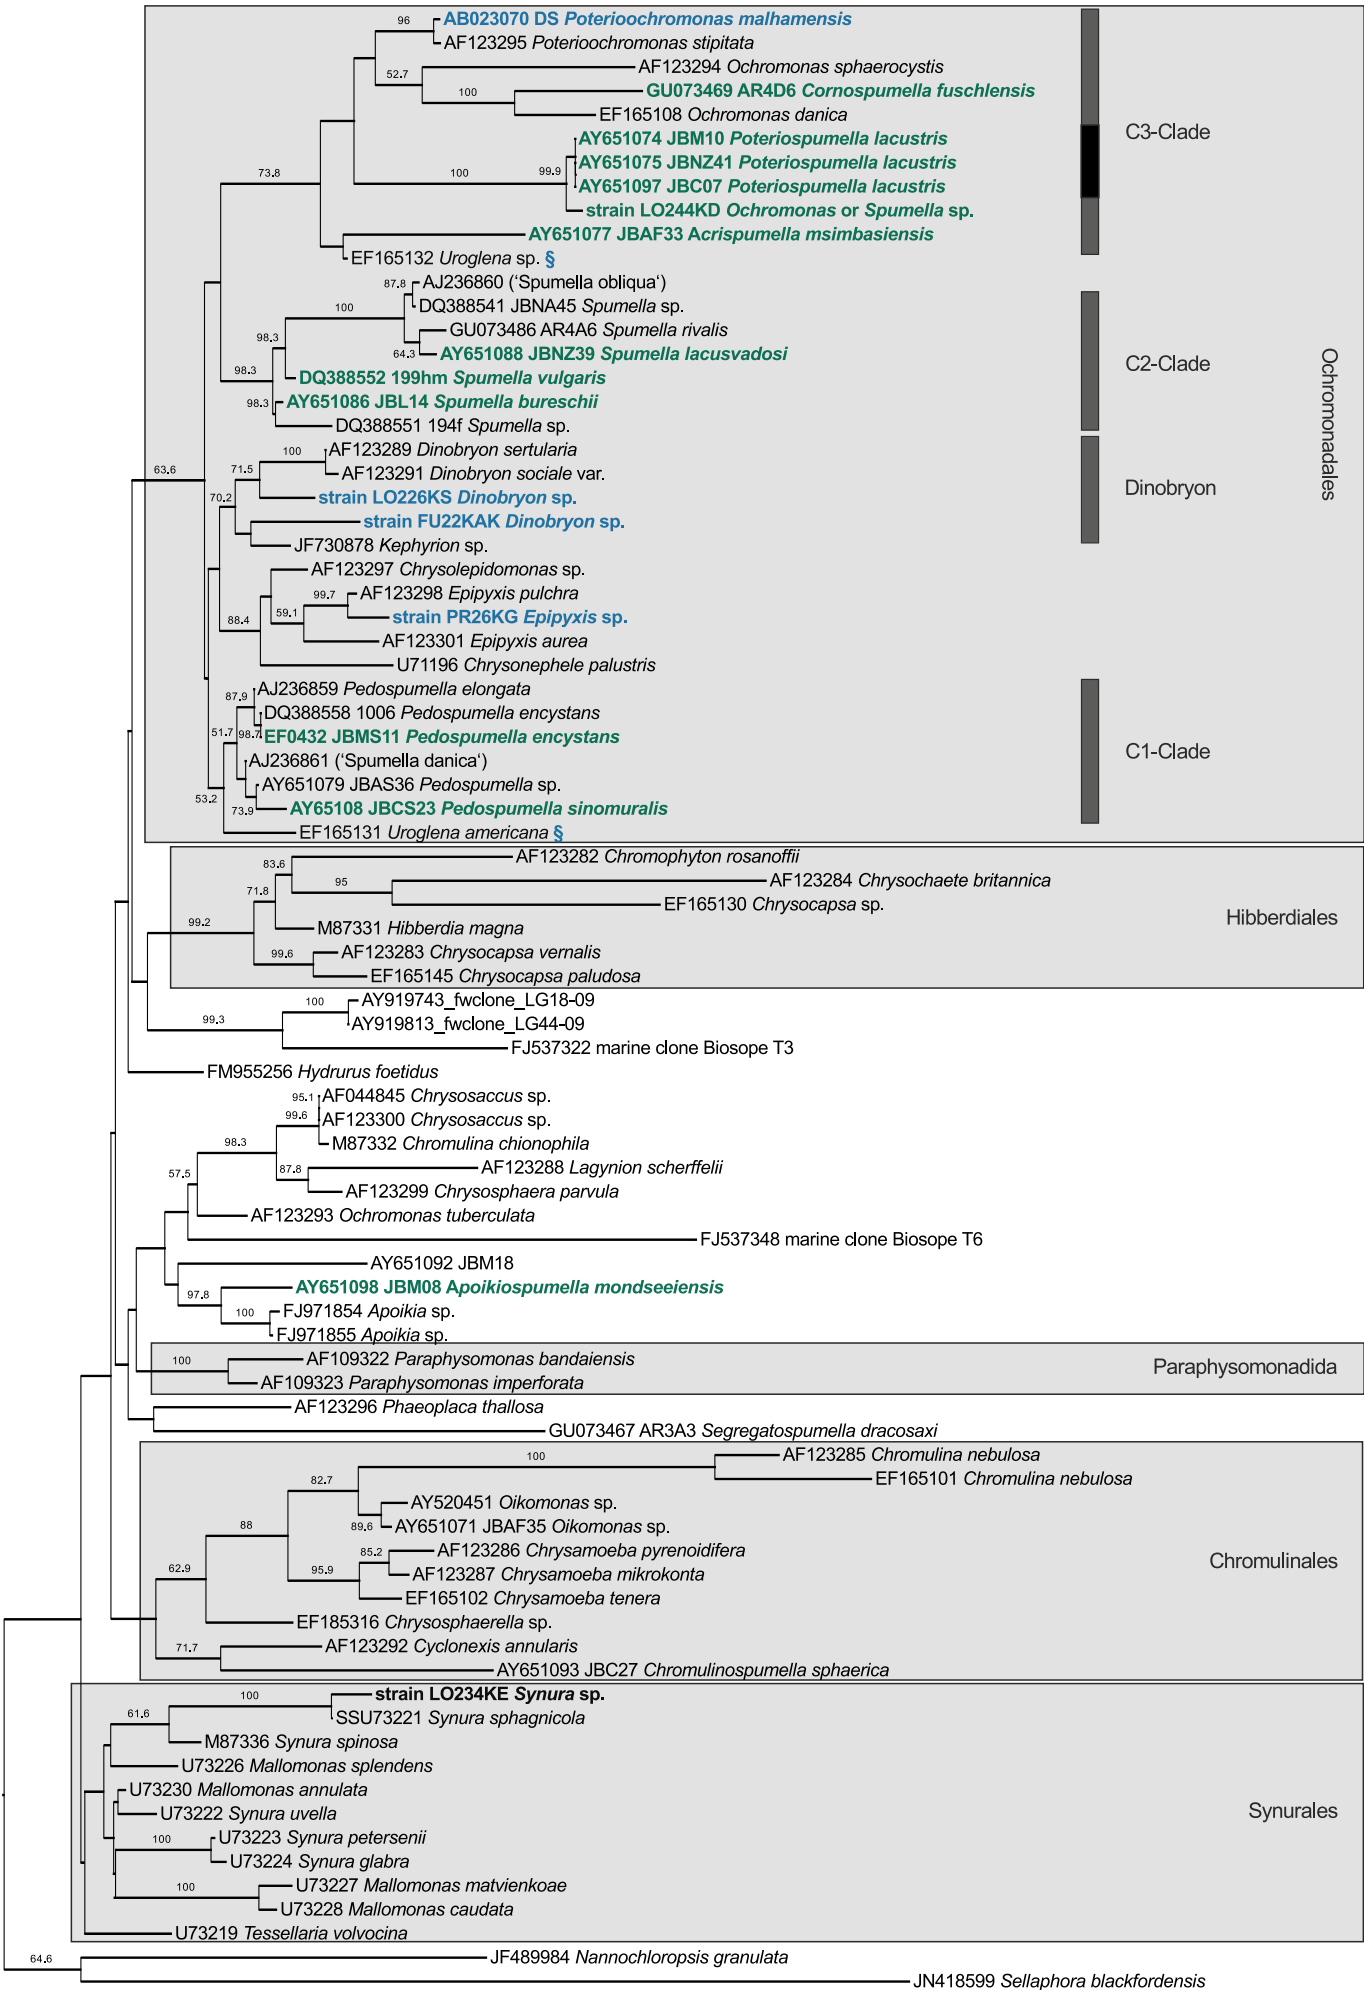

Supplement: SFig1.pdf [file SFig1.pdf]
